# Supplementary material
Source: HighWire-hosted journal article supplement (https://www.cmajopen.ca/highwire/filestream/87342/field_highwire_adjunct_files/0/open-2021-0085-1-at.pdf)
Supplement: open-2021-0085-1-at.pdf [file open-2021-0085-1-at.pdf]

**Table S1. Data elements collected at COVID Assessment Centres in Toronto, Ontario**

| <b>WCH (April 5 – Sept 30/20)</b>                                                             | <b>NYGH (April 12 - Sept 30/20)</b>         |
|-----------------------------------------------------------------------------------------------|---------------------------------------------|
| Date of swab                                                                                  | Date of swab                                |
| Age (in years)                                                                                | Age (in years)                              |
| Postal code                                                                                   | Postal code                                 |
| Gender                                                                                        | Gender                                      |
| Travel outside Canada in last 14 days (Y/N)                                                   | Travel outside Canada in last 14 days (Y/N) |
| Cough (Y/N)                                                                                   | Cough (Y/N)                                 |
| Fever (Y/N)                                                                                   | Fever (Y/N)                                 |
| Shortness of breath (Y/N)                                                                     | Shortness of breath                         |
| COVID test result (+/-)                                                                       | COVID test result (+/-)                     |
| Anosmia (Y/N)                                                                                 | Anosmia (Y/N)                               |
| Heart rate                                                                                    | Heart rate (>110 vs </=110)                 |
| Temperature                                                                                   | Temperature                                 |
| Respiratory rate                                                                              | Respiratory rate (>24/min vs. </= 24/min)   |
| Blood pressure                                                                                | Blood pressure                              |
| SaO2 (<92% vs >/=92%)                                                                         | SaO2 (<92% vs >/=92%)                       |
|                                                                                               |                                             |
| Sore throat (Y/N)                                                                             | NA                                          |
| Runny nose (Y/N)                                                                              | NA                                          |
| Myalgia (Y/N)                                                                                 | NA                                          |
| Date of onset of cough, fever, shortness of breath, anosmia, sore throat, runny nose, myalgia | NA                                          |
